# Supplementary material for: Anti-Müllerian Hormone Levels among Female Firefighters
Source: Int J Environ Res Public Health. 2022 May 14;19(10):5981. doi: 10.3390/ijerph19105981 (PMC9141260; doi:10.3390/ijerph19105981)
Supplement: Supplementary file 1 [file ijerph-19-05981-s001.zip › ijerph-1646144-supplementary.pdf]

**Table S1.** Sensitivity Analysis Percent Change in Anti-müllerian Hormone Levels Comparing Non-Firefighters and Firefighters, Excluding Probably Polycystic Ovary Syndrome ( $n=142$ ).

| <b>Firefighting Status</b>  | <b>AMH (ng/mL),<br/>Mean <math>\pm</math> SD, [Range]</b> | <b>Model 1<br/>% Difference (95% CI)</b> | <b>Model 2<br/>% Difference (95% CI)</b> |
|-----------------------------|-----------------------------------------------------------|------------------------------------------|------------------------------------------|
| Non-firefighters ( $n=50$ ) | 2.89 $\pm$ 2.56, [0.26, 9.70]                             | 0.00 (Ref.)                              | 0.00 (Ref.)                              |
| Firefighters ( $n=92$ )     | 1.96 $\pm$ 2.06, [0.02, 8.48]                             | -56.78 (-74.88, -25.62)                  | -34.46 (-56.40, -1.46)                   |

Abbreviations: AMH- Anti-müllerian hormone; CI- Confidence Interval; SD- Standard Deviation

Model 1: Linear regression of log(AMH) and firefighting status

Model 2: adjusted for age, age<sup>2</sup>, and Body Mass Index

% Difference Calculated by:  $([\exp(\beta) - 1] \times 100)$

**Table S2.** Sensitivity Analysis Among Firefighters, Occupational Exposures and Percent Change in Anti-müllerian Hormone, Excluding Probable Polycystic Ovary Syndrome ( $n=92$ ).

| Firefighting-Related Exposure                              | AMH (ng/mL),<br>Mean $\pm$ SD, [Range] | Model 1<br>% Difference (95% CI) | Model 2<br>% Difference (95% CI) |
|------------------------------------------------------------|----------------------------------------|----------------------------------|----------------------------------|
| Years in the fire service continuous (per 5-year increase) |                                        | -51.14 (-60.77, -39.15)          | 1.06 (-25.79, 37.62)             |
| Live fires responded to in a typical month                 |                                        | 2.39 (-4.33, 9.58)               | 2.20 (-2.63, 7.27)               |
| Poor fit of any personal protective equipment              |                                        |                                  |                                  |
| No ( $n=43$ )                                              | 1.88 $\pm$ 2.03, [0.02, 7.21]          | 0.00 (Ref.)                      | 0.00 (Ref.)                      |
| Yes ( $n=49$ )                                             | 2.03 $\pm$ 2.11, [0.02, 8.48]          | 25.40 (-39.82, 161.28)           | 62.74 (-2.92, 172.80)            |
| Poor fit of self-contained breathing apparatus (SCBA)      |                                        |                                  |                                  |
| No ( $n=70$ )                                              | 1.92 $\pm$ 2.04, [0.02, 8.48]          | 0.00 (Ref.)                      | 0.00 (Ref.)                      |
| Yes ( $n=22$ )                                             | 2.08 $\pm$ 2.16, [0.02, 8.09]          | 22.11 (-48.30, 188.41)           | 57.63 (-15.89, 195.39)           |
| Wildland firefighting                                      |                                        |                                  |                                  |
| No ( $n=60$ )                                              | 2.04 $\pm$ 2.13, [0.02, 8.09]          | 0.00 (Ref.)                      | 0.00 (Ref.)                      |
| Yes ( $n=31$ )                                             | 1.74 $\pm$ 1.92, [0.02, 8.48]          | 3.64 (-52.44, 125.83)            | -11.72 (-49.21, 53.46)           |

Abbreviations: AMH- Anti-müllerian hormone; CI- Confidence Interval; SD- Standard Deviation

Model 1: Linear regression of log(AMH) and firefighting-related exposure

Model 2: adjusted for age, age<sup>2</sup>, and Body Mass Index

% Difference Calculated by:  $([\exp(\beta) - 1] \times 100)$

**Table S3.** Percent Change in Anti-müllerian Hormone Levels Comparing Non-Firefighters and Firefighters, Stratified by Age Group (*n*=164).

| Age Group                      | Firefighting Status     | AMH (ng/mL),<br>Mean ± SD, [Range] | Model 1<br>% Difference (95% CI) | Model 2<br>% Difference (95% CI) | Interaction<br><i>p</i> -Value* |
|--------------------------------|-------------------------|------------------------------------|----------------------------------|----------------------------------|---------------------------------|
| <32 years ( <i>n</i> =40)      | Non-firefighters (n=18) | 6.70 ± 5.40, [0.47, 17.3]          | 0.00 (Ref.)                      | 0.00 (Ref.)                      | 0.71                            |
|                                | Firefighters (n=22)     | 5.56 ± 4.62, [1.25, 17.3]          | -2.15 (-46.63, 79.38)            | -1.62 (-47.13, 83.09)            |                                 |
| 32 to 37 years ( <i>n</i> =46) | Non-firefighters (n=19) | 4.82 ± 3.76, [0.36, 13.59]         | 0.00 (Ref.)                      | 0.00 (Ref.)                      |                                 |
|                                | Firefighters (n=27)     | 4.76 ± 4.57, [0.13, 15.37]         | -17.25 (-57.54, 61.25)           | -16.20 (-58.29, 68.37)           |                                 |
| 38+ years ( <i>n</i> =78)      | Non-firefighters (n=21) | 1.98 ± 3.03, [0.16, 14.08]         | 0.00 (Ref.)                      | 0.00 (Ref.)                      |                                 |
|                                | Firefighters (n=57)     | 1.05 ± 1.39, [0.02, 6.77]          | -63.51 (-83.77, -17.93)          | -49.17 (-74.73, 2.25)            |                                 |

\*Interaction term between age category and firefighting status

Model 1: Linear regression of log(AMH) and firefighting-related exposure

Model 2: adjusted for age, age<sup>2</sup>, and Body Mass Index

% Difference Calculated by:  $([\exp(\beta) - 1] \times 100)$
